# Supplementary figures and images for: Patient-derived precision cut tissue slices from primary liver cancer as a potential platform for preclinical drug testing
Source: PubMed Central journal article supplement — eBioMedicine. 2023 Oct 10;97:104826. doi: 10.1016/j.ebiom.2023.104826 (PMC10667128; doi:10.1016/j.ebiom.2023.104826), 2023-10-10

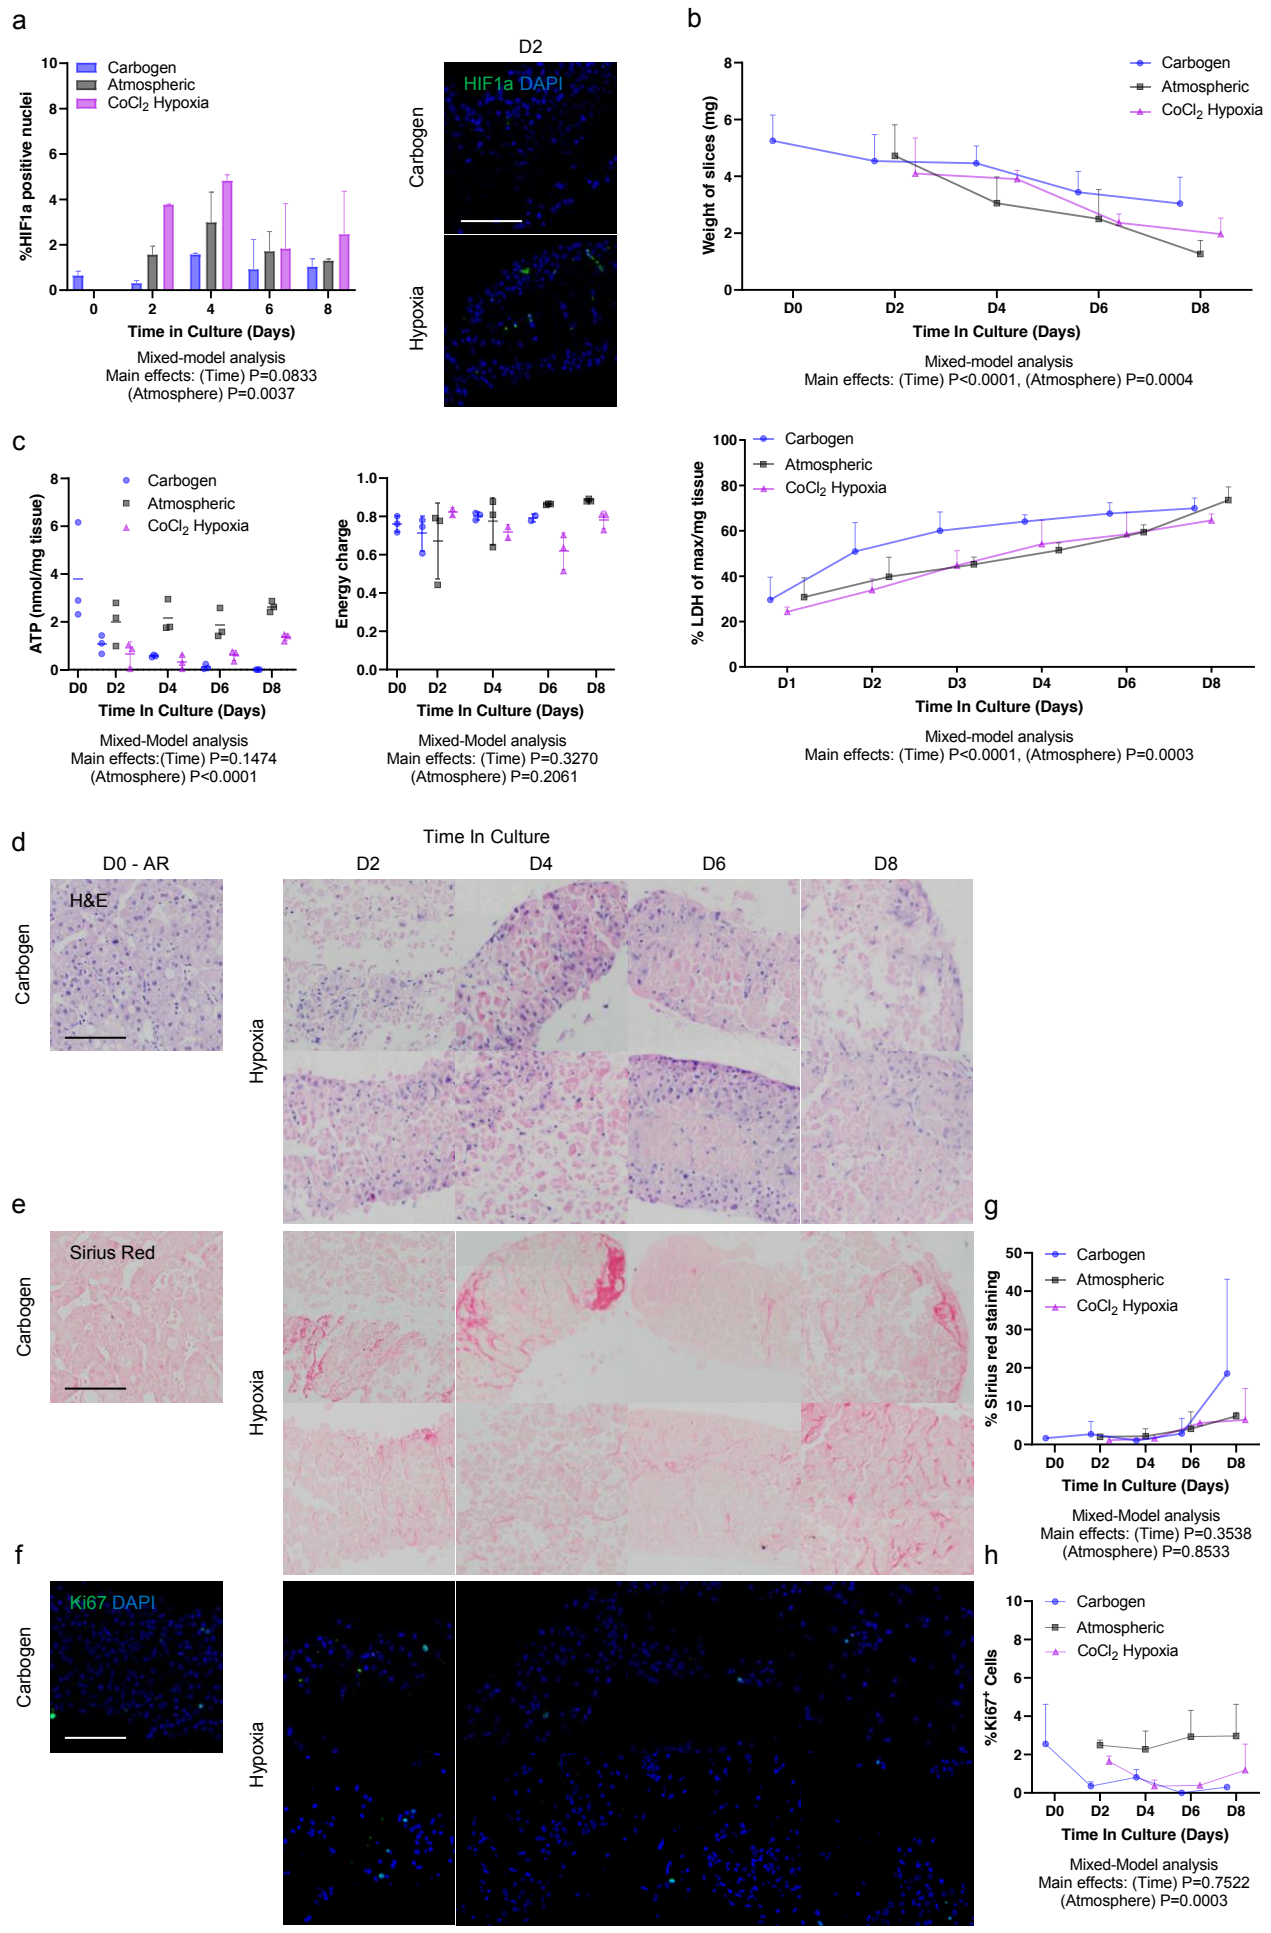

Supplementary Figure 2

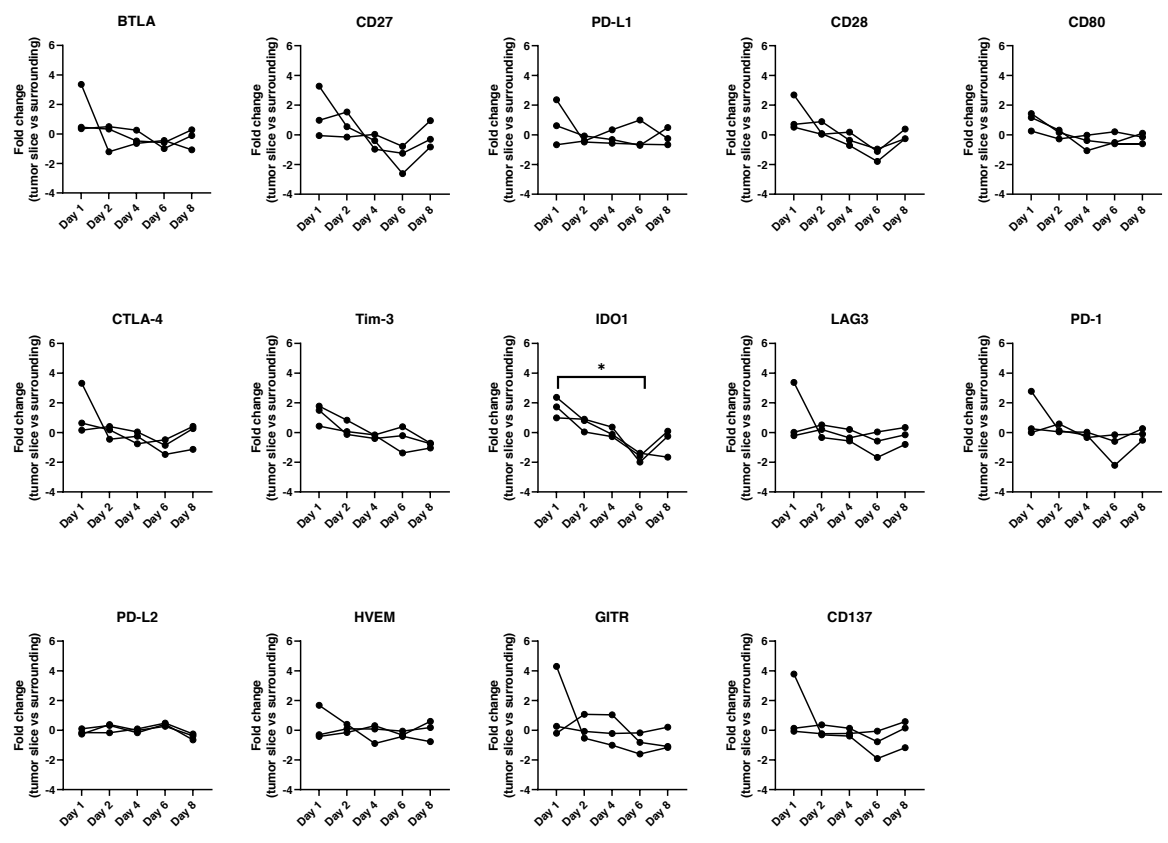

Supplement: mmc1.pdf [file mmc1.pdf]
